# Supplementary material for: 3D observational analysis of convection around and inside a self-propelled droplet
Source: Royal Society of Chemistry journal article supplement (doi:10.1039/d4ra09004g), 2025-01-01
Supplement: d4ra09004g5.pdf [file d4ra09004g5.pdf]

## Supplementary Information

### 3D observational analysis of convection around and inside a self-propelled droplet

Tamako Suzuki<sup>\*a</sup> and Hideyuki Sawada<sup>b</sup>

<sup>a</sup> Department of Pure and Applied Physics, Graduated School of Advanced Science and Engineering, Waseda University, 3-4-1 Okubo, Shinjuku-Ku, Tokyo, 169-8555, Japan.

<sup>b</sup> Faculty of Science and Engineering, Waseda University, 3-4-1 Okubo, Shinjuku-Ku, Tokyo, 169-8555, Japan.

#### Contents

|                                                            |   |
|------------------------------------------------------------|---|
| S1. PIV data about the convection around the droplet ..... | 2 |
| S2. PIV data about the convection inside the droplet.....  | 4 |
| S3. Supporting video information .....                     | 5 |

## S1. PIV data about the convection around the droplet

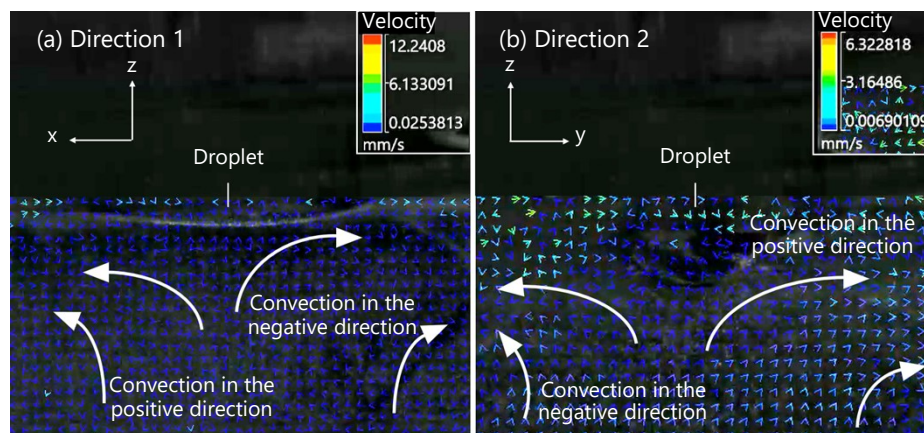

Fig. S1 Convection generated around a droplet, under the condition of using the aqueous solution with a concentration of 0.5 mL / 100 mL of water and the asymmetrical exoskeleton. (a) Convection captured from Direction 1. (b) Convection captured from Direction 2.

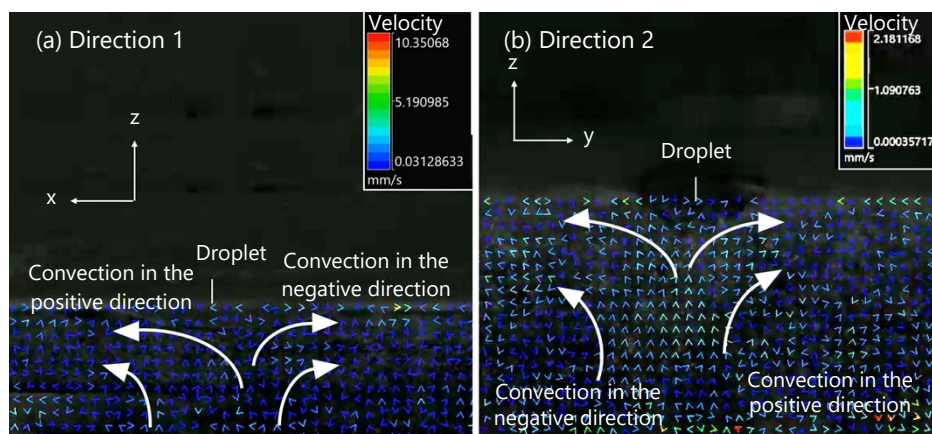

Fig. S2 Convection generated around a droplet, under the condition of using the aqueous solution with a concentration of 2.3 mL / 100 mL of water and the symmetrical exoskeleton. (a) Convection captured from Direction 1. (b) Convection captured from Direction 2.

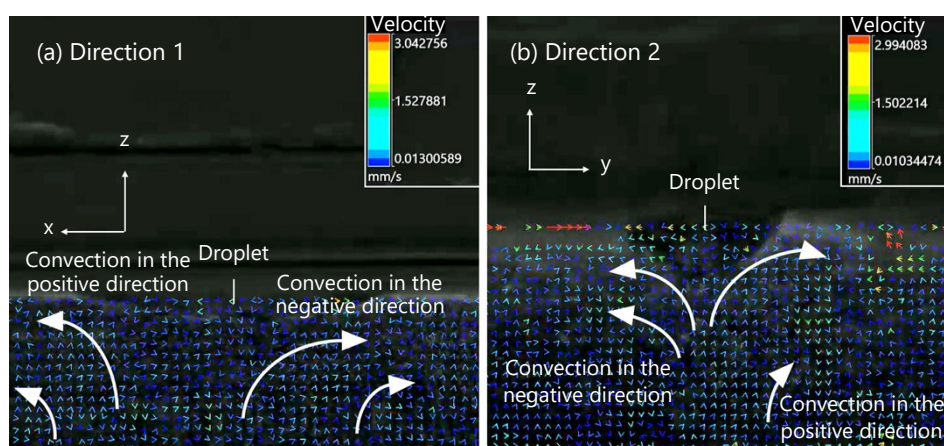

Fig. S3 Convection generated around a droplet, under the condition of using the aqueous solution with a concentration of 2.3 mL / 100 mL of water and the asymmetrical exoskeleton. (a) Convection captured from Direction 1. (b) Convection captured from Direction 2.

## S2. PIV data about the convection inside the droplet

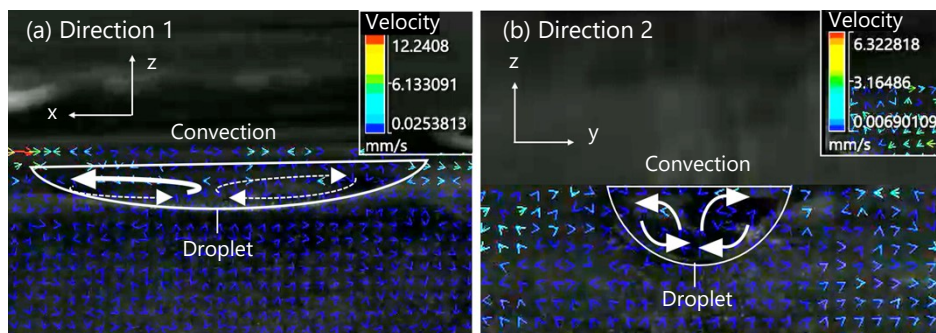

Fig. S4 Convection generated inside a droplet, under the condition of using the aqueous solution with a concentration of 0.5 mL / 100 mL of water and the asymmetrical exoskeleton. (a) Convection captured from Direction 1. (b) Convection captured from Direction 2.

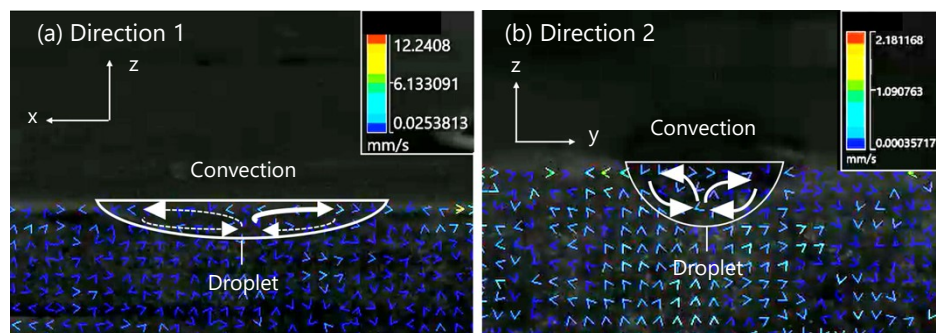

Fig. S5 Convection generated inside a droplet, under the condition of using the aqueous solution with a concentration of 2.3 mL / 100 mL of water and the symmetrical exoskeleton. (a) Convection captured from Direction 1. (b) Convection captured from Direction 2.

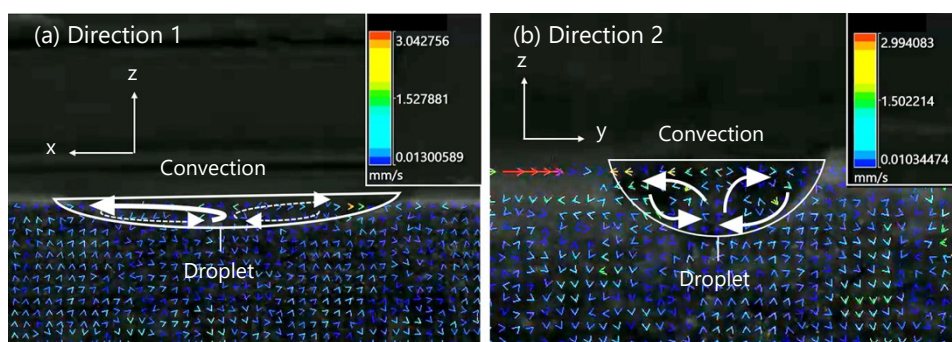

Fig. S6 Convection generated inside a droplet, under the condition of using the aqueous solution with a concentration of 2.3 mL / 100 mL of water and the asymmetrical exoskeleton. (a) Convection captured from Direction 1. (b) Convection captured from Direction 2.

### **S3. Supporting video information**

**Movie S1:** Self-propulsion behavior of a 1-pentanol droplet under the condition of using the aqueous solution with a concentration of 0.5 mL / 100 mL water and the symmetrical exoskeleton.

**Movie S2:** Self-propulsion behavior of a 1-pentanol droplet under the condition of using the aqueous solution with a concentration of 0.5 mL / 100 mL water and the asymmetrical exoskeleton.

**Movie S3:** Self-propulsion behavior of a 1-pentanol droplet under the condition of using the aqueous solution with a concentration of 2.3 mL / 100 mL water and the symmetrical exoskeleton.

**Movie S4:** Self-propulsion behavior of a 1-pentanol droplet under the condition of using the aqueous solution with a concentration of 2.3 mL / 100 mL water and the asymmetrical exoskeleton.
